# Supplementary material for: Enhanced photovoltaic performance of dye-sensitized solar cells based on Sr-doped TiO2/SrTiO3 nanorod array heterostructures
Source: Royal Society of Chemistry journal article supplement (doi:10.1039/c5ta03810c), 2015-01-01
Supplement: c5ta03810c1.pdf [file c5ta03810c1.pdf]

### *Supporting Information*

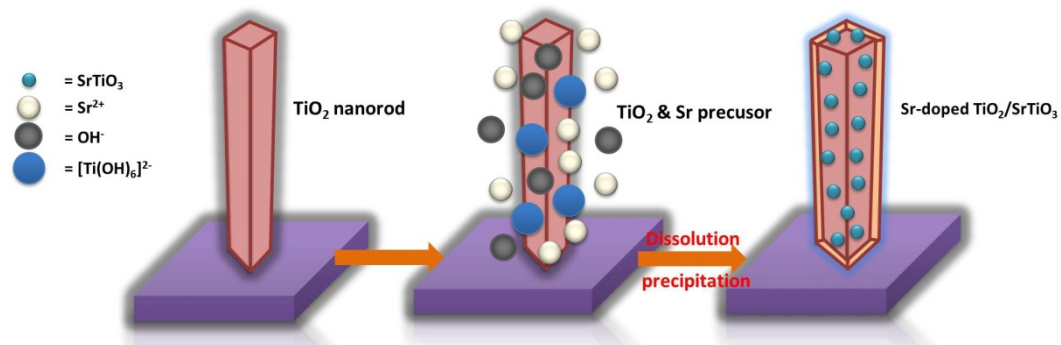

Figure S1. The growth process illustration of Sr-doped  $\text{TiO}_2/\text{SrTiO}_3$  heterostructure.
